# Supplementary material
Source: PubMed Central journal article supplement (PMC6827878)
Supplement: NIHMS1055800-supplement-Tables_S1-S4.pdf [file NIHMS1055800-supplement-Tables_S1-S4.pdf]

**Cell, Volume 175**

**Supplemental Information**

**Multi-level Proteomics Identifies CT45  
as a Chemosensitivity Mediator  
and Immunotherapy Target in Ovarian Cancer**

**Fabian Coscia, Ernst Lengyel, Jaikumar Duraiswamy, Bradley Ashcroft, Michal Bassani-Sternberg, Michael Wierer, Alyssa Johnson, Kristen Wroblewski, Anthony Montag, S. Diane Yamada, Blanca López-Méndez, Jakob Nilsson, Andreas Mund, Matthias Mann, and Marion Curtis**

| Patient | PlatinumValue | Days to platinum resistance | Disease free days | Overall survival days | Status   | Refractory |
|---------|---------------|-----------------------------|-------------------|-----------------------|----------|------------|
| 2       | Resistant     | -54                         | 114               | 241                   | deceased | y          |
| 24      | Sensitive     | 2584                        | 2754              | 2903                  | deceased | n          |
| 8       | Resistant     | 31                          | 211               | 228                   | deceased | n          |
| 3       | Resistant     | -22                         | 114               | 1489                  | deceased | y          |
| 13      | Sensitive     | 382                         | 573               | 1479                  | deceased | n          |
| 18      | Sensitive     | 971                         | 1133              | 1716                  | deceased | n          |
| 25      | Sensitive     | 3100                        | 3229              | 3229                  | alive    | n          |
| 14      | Sensitive     | 440                         | 580               | 1106                  | deceased | n          |
| 5       | Resistant     | 18                          | 161               | 363                   | deceased | n          |
| 20      | Sensitive     | 1111                        | 1296              | 3046                  | alive    | n          |
| 21      | Sensitive     | 1271                        | 1498              | 1573                  | deceased | n          |
| 11      | Resistant     | -37                         | 391               | 567                   | deceased | n          |
| 23      | Sensitive     | 2478                        | 2603              | 2603                  | alive    | n          |
| 16      | Sensitive     | 462                         | 663               | 1347                  | deceased | n          |
| 7       | Resistant     | 20                          | 210               | 345                   | deceased | n          |
| 17      | Sensitive     | 864                         | 1008              | 1528                  | deceased | n          |
| 4       | Resistant     | 29                          | 155               | 485                   | deceased | n          |
| 10      | Resistant     | 104                         | 366               | 922                   | deceased | n          |
| 12      | Sensitive     | 366                         | 552               | 973                   | deceased | n          |
| 6       | Resistant     | 52                          | 190               | 790                   | deceased | n          |
| 9       | Resistant     | 134                         | 335               | 1118                  | deceased | n          |
| 15      | Sensitive     | 397                         | 588               | 1078                  | deceased | n          |
| 22      | Sensitive     | 1665                        | 1804              | 1804                  | alive    | n          |
| 19      | Sensitive     | 1051                        | 1188              | 1467                  | alive    | n          |
| 1       | Resistant     | 11                          | 113               | 280                   | deceased | y          |

Table S1, related to Figure 1: Clinico-pathologic parameters for the resistant and sensitive patients analyzed by proteomics.

|                                  | Chemotherapy Status |      |                      |      | P value  | All cases |
|----------------------------------|---------------------|------|----------------------|------|----------|-----------|
|                                  | Resistant           |      | Sensitive            |      |          |           |
|                                  | No.                 | %    | No.                  | %    |          |           |
| <b>Stage</b>                     |                     |      |                      |      | 1.00     |           |
| 3                                | 8                   | 72.7 | 10                   | 71.4 |          | 18        |
| 4                                | 3                   | 27.3 | 4                    | 28.6 |          | 7         |
| <b>Primary Site</b>              |                     |      |                      |      | 0.0850   |           |
| Fallopian Tube                   | 4                   | 36.4 | 6                    | 42.8 |          | 10        |
| Ovary                            | 7                   | 63.6 | 4                    | 28.6 |          | 11        |
| Peritoneum                       | 0                   | 0    | 4                    | 28.6 |          | 4         |
| <b>Residual Disease</b>          |                     |      |                      |      | 0.0531   |           |
| Larger than 1 cm                 | 8                   | 72.7 | 5                    | 35.7 |          | 13        |
| Smaller than 1 cm                | 2                   | 18.2 | 9                    | 64.3 |          | 11        |
| Unknown                          | 1                   | 9.1  | 0                    | 0    |          | 1         |
| <b>Grade</b>                     |                     |      |                      |      | 0.4867   |           |
| 2                                | 0                   | 0    | 2                    | 14.3 |          | 2         |
| 3                                | 11                  | 100  | 12                   | 85.7 |          | 23        |
| <b>Chemo Type</b>                |                     |      |                      |      |          |           |
| Adjuvant/1st line                | 11                  | 100  | 14                   | 100  |          |           |
| <b>Chemo Class</b>               |                     |      |                      |      | 1.00     |           |
| Platinum only                    | 0                   | 0    | 1                    | 7.1  |          | 1         |
| Taxane/Platinum                  | 11                  | 100  | 13                   | 92.9 |          | 24        |
| <b>Progression free survival</b> |                     |      |                      |      |          |           |
| Median days (range)              | 190<br>(113-391)    |      | 1160.5<br>(552-3229) |      | < 0.0001 |           |
| <b>Overall survival</b>          |                     |      |                      |      |          |           |
| Median days (range)              | 448<br>(228-1489)   |      | 1550.5<br>(967-3229) |      | <0.0001  |           |
| <b>Age</b>                       |                     |      |                      |      |          |           |
| Mean age (range)                 | 60.0<br>(47-78)     |      | 67.1<br>(51-86)      |      | 0.0908   |           |

Table S2, related to Figure 1: Clinico-pathologic parameters for the resistant and sensitive patient groups analyzed by proteomics.

|                         | CT45 Status |         |           |         | P value |
|-------------------------|-------------|---------|-----------|---------|---------|
|                         | 0 (N=82)    |         | 1+ (N=42) |         |         |
|                         | No.         | %       | No.       | %       |         |
| <b>Stage</b>            |             |         |           |         | 0.72    |
| 3                       | 56          | 68.29   | 30        | 71.43   |         |
| 4                       | 26          | 31.71   | 12        | 28.57   |         |
| <b>Primary Site</b>     |             |         |           |         | 0.41    |
| Fallopian Tube          | 10          | 12.2    | 9         | 21.43   |         |
| Ovary                   | 62          | 75.61   | 29        | 69.05   |         |
| Peritoneum              | 10          | 12.2    | 4         | 9.52    |         |
| <b>Residual Disease</b> |             |         |           |         | 0.10    |
| Larger than 1 cm        | 47          | 57.32   | 17        | 40.48   |         |
| Smaller than 1 cm       | 34          | 41.46   | 25        | 59.52   |         |
| Unknown                 | 1           | 1.22    | 0         | 0       |         |
| <b>Grade</b>            |             |         |           |         | 0.59    |
| 1                       | 1           | 1.22    | 0         | 0       |         |
| 2                       | 22          | 26.83   | 8         | 19.05   |         |
| 3                       | 59          | 71.95   | 34        | 80.95   |         |
| <b>Chemo Type</b>       |             |         |           |         | 0.67    |
| Adjuvant/1st line       | 64          | 78.05   | 35        | 83.33   |         |
| Neoadjuvant             | 13          | 15.85   | 4         | 9.52    |         |
| None                    | 5           | 6.1     | 3         | 7.14    |         |
| <b>Chemo Class</b>      |             |         |           |         | 0.19    |
| Other                   | 4           | 4.88    | 6         | 14.29   |         |
| Taxane/Platinum         | 73          | 89.02   | 33        | 78.57   |         |
| None                    | 5           | 6.1     | 3         | 7.14    |         |
| <b>Chemoresistance</b>  |             |         |           |         | 0.005   |
| resistant               | 46          | 56.1    | 10        | 23.81   |         |
| intermediate            | 11          | 13.41   | 9         | 21.43   |         |
| sensitive               | 19          | 23.17   | 18        | 42.86   |         |
| N/A                     | 6           | 7.32    | 5         | 11.9    |         |
| <b>Mean age (range)</b> | 62          | (33-94) | 58        | (33-82) | 0.13    |

Table S4, related to Figure 1: Clinico-pathologic parameters for patients with advanced FIGO stage III and IV serous-papillary ovarian cancer included in the TMA validation cohort. Tumors were stained for CT45 and the staining was scored 0-3.
